# Supplementary material for: A multi-reference poly-conformational method for in silico design, optimization, and repositioning of pharmaceutical compounds illustrated for selected SARS-CoV-2 ligands
Source: PeerJ journal article supplement (doi:10.7717/peerj.14252), 2022-11-24
Supplement: Supplement.2022.08.11.pdf [file Supplement.2022.08.11.pdf]

**A multi-reference poly-conformational method for in silico design,  
optimization, and repositioning of pharmaceutical compounds illustrated for  
selected SARS-CoV-2 ligands.**

**Vadim Alexandrov<sup>1</sup>, Alexander Kirpich<sup>2</sup>, Omar Kantidze<sup>3</sup>, and Yuriy Gankin<sup>\*3</sup>**

**1 Liquid Algo LLC, 85 Thistle Lane, Hopewell Junction, NY 12533, United States of  
America**

**2 Department of Population Health Sciences, School of Public Health, Georgia State  
University, Atlanta, GA, United States of America**

**3 Quantori LLC, 625 Mass Ave, Cambridge, MA 02139, United States of America**

**\* Corresponding author**

**E-mail: [yuriy.gankin@quantori.com](mailto:yuriy.gankin@quantori.com)**

## SUPPLEMENT

**Tab. S1.** The top scoring compounds from the Enamine “antiviral-like” virtual library (the first column) are sorted by their total overlap score  $W_{All}$  (the second column). The values in the other columns correspond to the sums of the overlap scores of the conformers for the corresponding reference compounds.

| Compound ID | Wall   | Olaparib | Tadalafil | Ergotamine | Remdesivir |
|-------------|--------|----------|-----------|------------|------------|
| Z1693453146 | 254.11 | 71.68    | 56.30     | 76.76      | 49.38      |
| Z434669842  | 248.84 | 66.18    | 55.33     | 69.92      | 57.41      |
| Z1381427631 | 248.57 | 66.63    | 52.86     | 72.84      | 56.24      |
| Z1381425049 | 247.97 | 66.09    | 53.03     | 71.98      | 56.88      |
| Z1313285936 | 246.97 | 67.70    | 55.51     | 72.23      | 51.54      |
| Z826278840  | 246.37 | 65.61    | 56.67     | 68.79      | 55.30      |
| Z94559538   | 245.69 | 70.41    | 55.41     | 65.24      | 54.64      |
| Z435640438  | 245.21 | 63.85    | 54.62     | 72.45      | 54.29      |
| Z435642248  | 245.13 | 64.04    | 55.31     | 71.85      | 53.93      |
| Z827564114  | 244.89 | 64.93    | 57.02     | 70.19      | 52.75      |

**Tab. S2.** The top scoring query compounds from the Enamine a “Diverse Discovery Set” virtual library (the first column) are sorted by their total overlap score  $W_{All}$  (the second column). The values in the other columns correspond to the sums of the overlap scores of the conformers for the corresponding reference compounds.

| Compound ID | Wall   | Olaparib | Tadalafil | Ergotamine | Remdesivir |
|-------------|--------|----------|-----------|------------|------------|
| Z1760146546 | 255.19 | 74.41    | 60.57     | 74.94      | 45.27      |
| Z3077896041 | 254.26 | 67.67    | 57.38     | 75.53      | 53.67      |
| Z2911083836 | 253.23 | 72.49    | 58.63     | 75.85      | 46.27      |
| Z2446617864 | 252.49 | 73.18    | 59.52     | 75.06      | 44.72      |
| Z1139281415 | 252.30 | 69.01    | 57.39     | 75.88      | 50.02      |
| Z1354703942 | 251.79 | 77.22    | 61.63     | 80.63      | 32.32      |
| Z2256366543 | 251.27 | 66.54    | 54.27     | 74.18      | 56.28      |
| Z1139281396 | 250.99 | 68.40    | 57.90     | 74.43      | 50.27      |
| Z1139280685 | 250.51 | 68.34    | 57.88     | 74.50      | 49.79      |
| Z2959367287 | 250.32 | 69.54    | 55.40     | 72.80      | 52.58      |
